# Supplementary material
Source: Springer Nature journal article supplement (https://www.springermedizin.de/resource/supplementary/12885_2005_531_MOESM1_ESM.pdf/9469694)

■ At diagnosis of PT ■ At diagnosis of MD

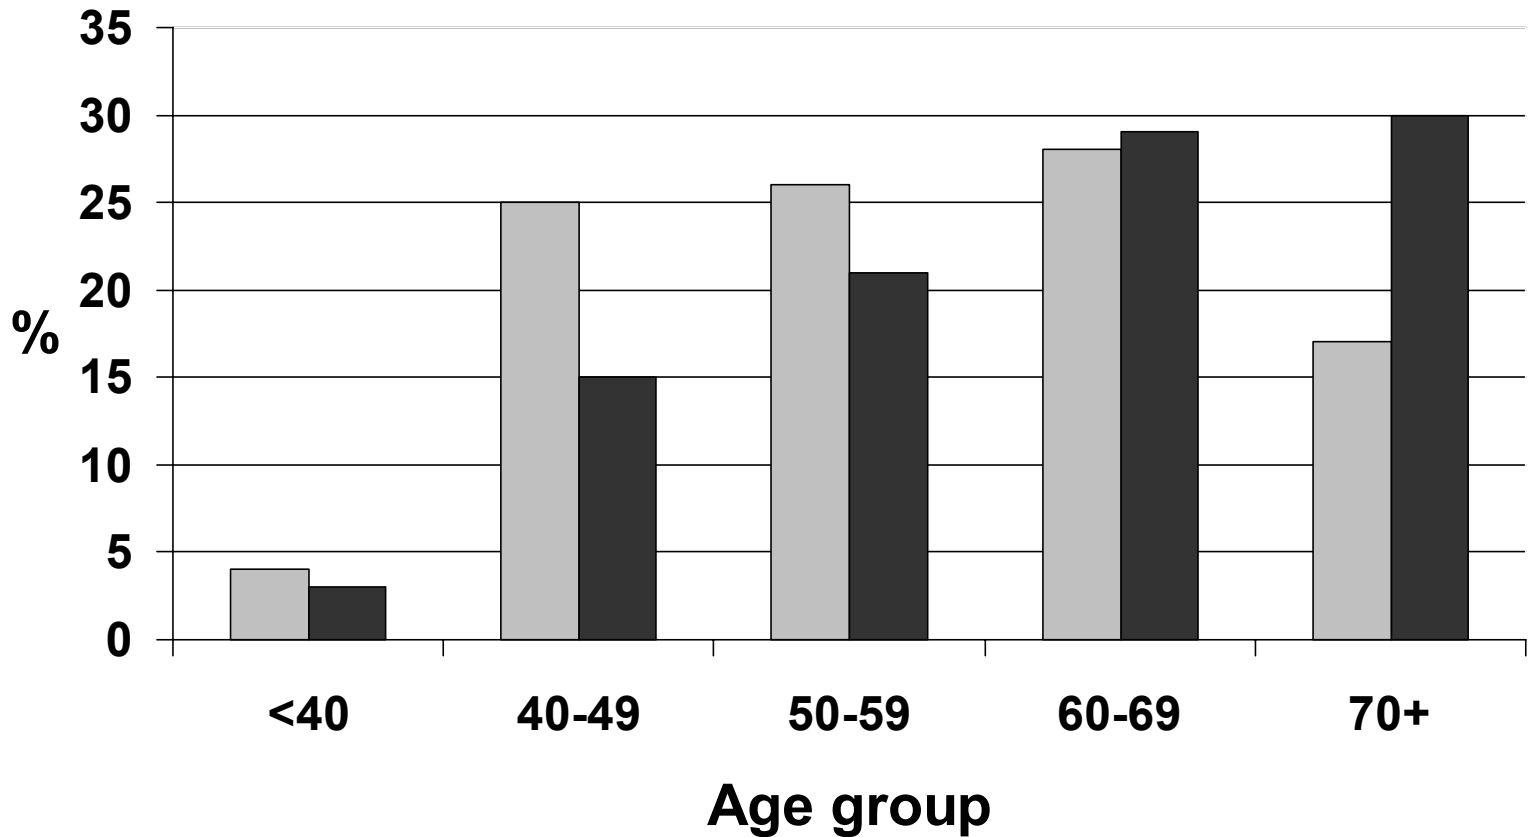

Supplement: MOESM1 [file 9469694]
